# Supplementary material for: Electrochemical deposition of nickel graphene composite coatings: effect of deposition temperature on its surface morphology and corrosion resistance
Source: Royal Society of Chemistry journal article supplement (doi:10.1039/c6ra28755g), 2017-01-01
Supplement: c6ra28755g1.pdf [file c6ra28755g1.pdf]

## Supporting information

### **Electrochemical deposition of nickel graphene composite coatings: Effect of deposition temperature on its surface morphology and corrosion resistance**

Abdul Jabbar<sup>aδ</sup>, Ghulam Yasin<sup>bδ</sup>, Waheed Qamar Khan<sup>c</sup>, M. Yousaf Anwar<sup>a</sup>, Rashid Mustafa Korai<sup>b</sup>, Muhammad Naeem Nizam<sup>b</sup> and Ghulam Muhyodin<sup>b</sup>

<sup>a</sup> Department of Metallurgical & Materials Engineering, University of Engineering and Technology Lahore, Pakistan.

<sup>b</sup> State Key laboratory of Chemical Resource Engineering, Beijing University of Chemical Technology, Beijing 100029, P.R. China.

<sup>c</sup> College of Materials Science and Engineering, Beijing University of Technology, Beijing, 100029, P.R. China.

δ = equal contribution

#### **To whom correspondence should be addressed:**

**Professor Dr. Muhammad Yousaf Anwar**

Address: Department of Metallurgical & Materials Engineering, University of Engineering and Technology Lahore - 54000, Punjab, Pakistan.

E-mail: [myanwar86@hotmail.com](mailto:myanwar86@hotmail.com)

**Table S1-** Scherrer's equation parameters of composite coatings obtained at different temperatures.

| Bath temperature (°C) | $\Theta$ | hkl plane | FWHM   | Average D (nm) |
|-----------------------|----------|-----------|--------|----------------|
| 15                    | 21.93    | (111)     | 0.2197 | 26             |
|                       | 25.95    | (200)     | 0.3271 |                |
|                       | 37.89    | (220)     | 0.1987 |                |
| 30                    | 21.95    | (111)     | 0.2879 | 25             |
|                       | 25.98    | (200)     | 0.3468 |                |
|                       | 38.26    | (220)     | 0.4758 |                |
| 45                    | 22.17    | (111)     | 0.2298 | 19             |
|                       | 25.74    | (200)     | 0.3973 |                |
|                       | 38.32    | (220)     | 0.5246 |                |
| 60                    | 22.35    | (111)     | 0.2938 | 28             |
|                       | 26.43    | (200)     | 0.3862 |                |
|                       | 38.52    | (220)     | 0.4265 |                |

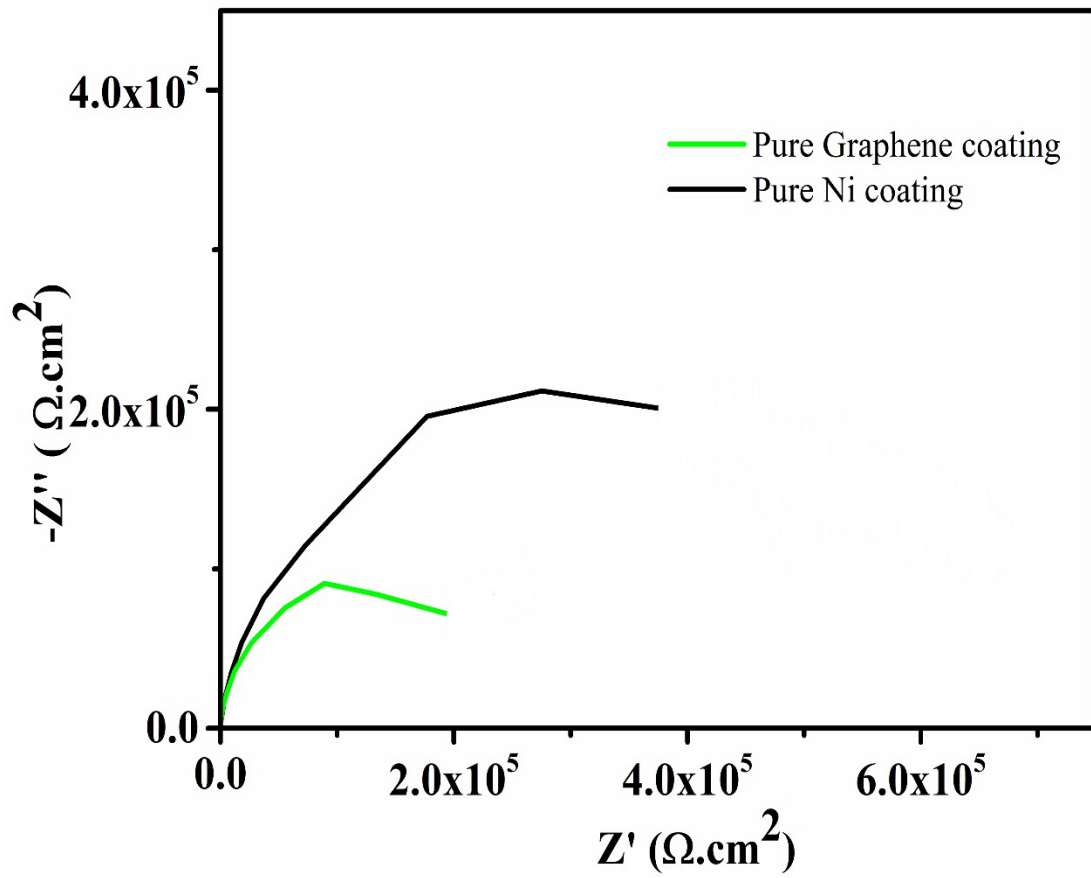

**Fig.S1.** Effect of deposition temperature on the impedance spectra of pure Ni and pure graphene coatings in 3.5% NaCl solution.

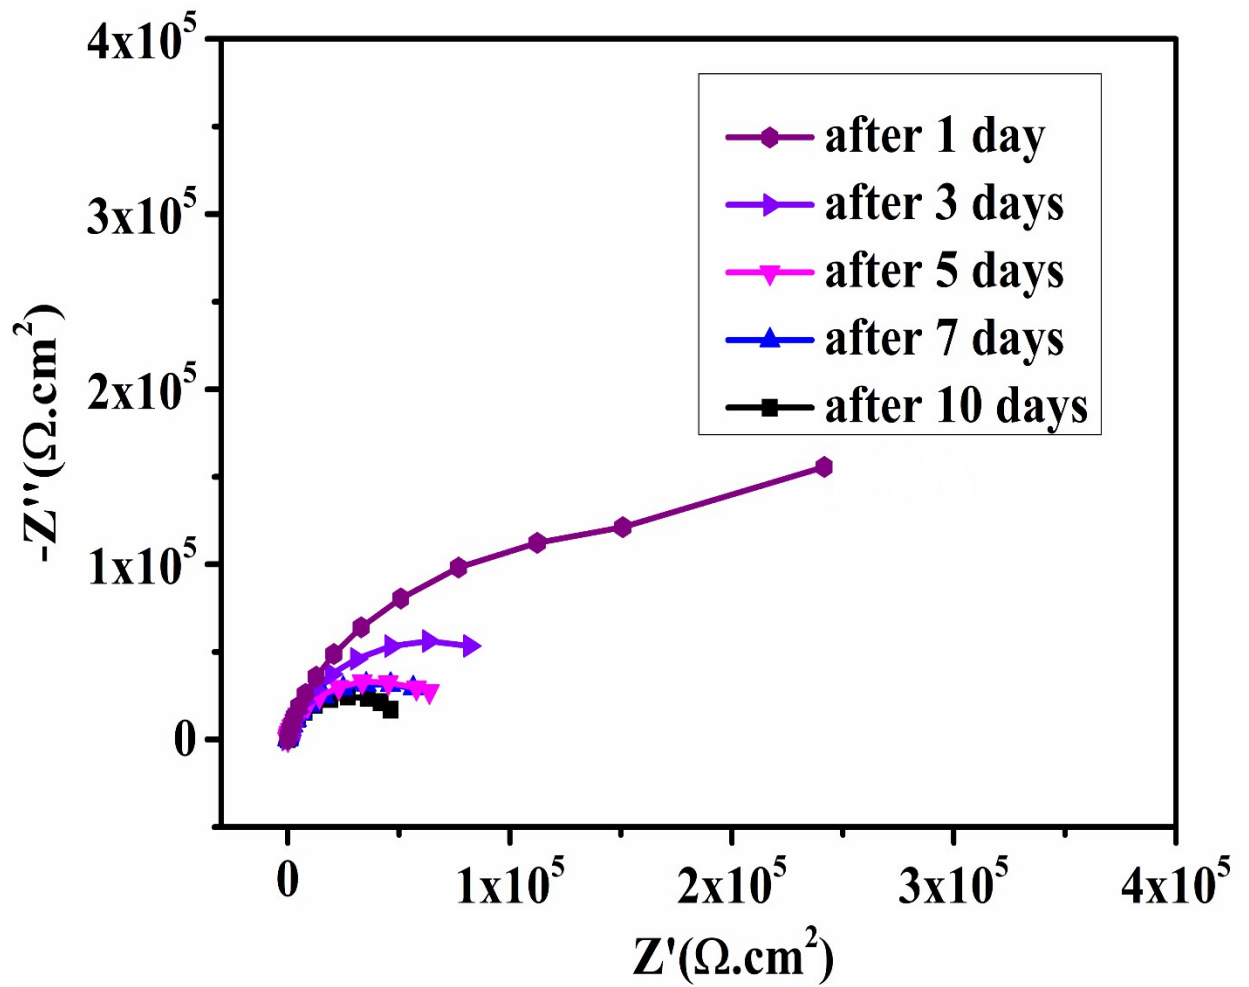

**Fig.S2.** Effect of deposition temperature on the impedance spectra of composite coatings at different immersion time (1, 3, 5, 7 and 10 days) in 3.5% NaCl solution.
